# Supplementary material for: Whole-Genome Sequencing of Emerging Invasive Neisseria meningitidis Serogroup W in Sweden
Source: PubMed Central journal article supplement (PMC5869829; doi:10.1128/jcm.01409-17), 2018-03-26
Supplement: JCM.01409-17_zjm999095870s1.pdf [file JCM.01409-17_zjm999095870s1.pdf]

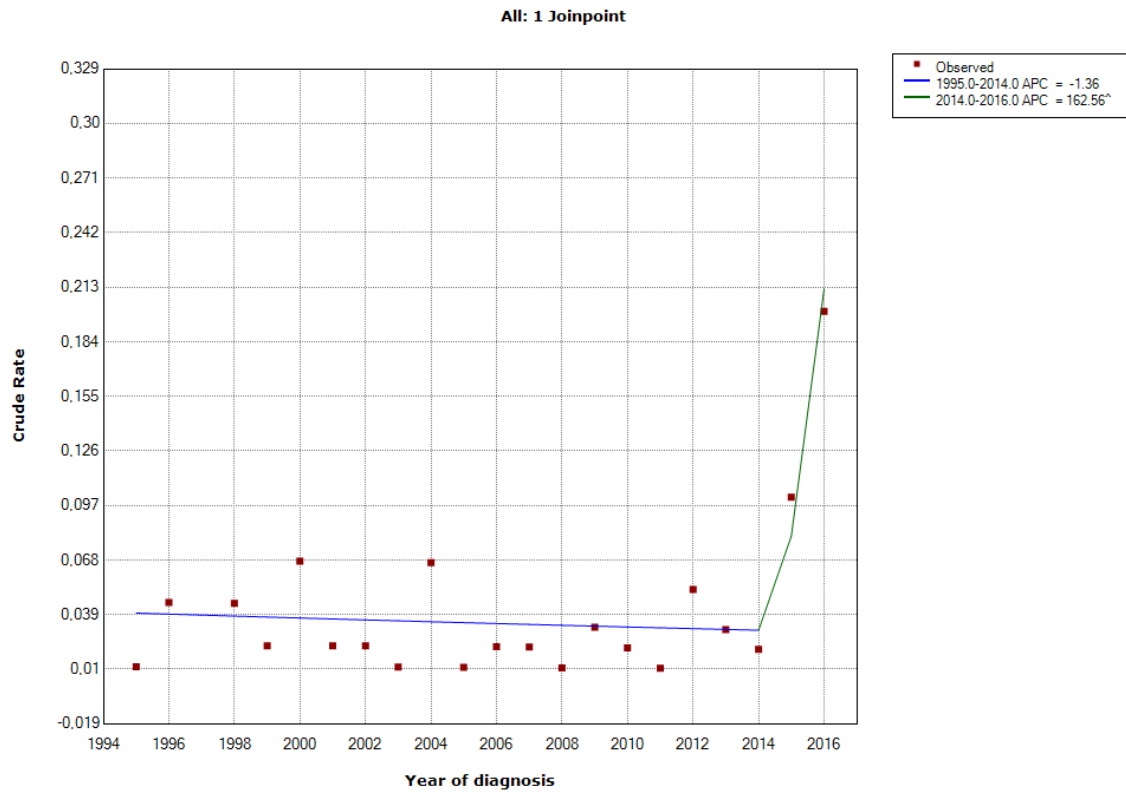

^ Indicates that the Annual Percent Change (APC) is significantly different from zero at the alpha = 0.05 level.  
 Final Selected Model: 1 Joinpoint.

Fig S1. Trends in MenW incidence from 1994 to 2016 (no cases in 1997) using joinpoint regression analysis. ^ indicates that the annual percent change (APC) is significantly different.
