# Supplementary material for: Whole-Genome Sequencing of Emerging Invasive Neisseria meningitidis Serogroup W in Sweden
Source: PubMed Central journal article supplement (PMC5869829; doi:10.1128/jcm.01409-17), 2018-03-26
Supplement: JCM.01409-17_zjm999095870s2.pdf [file JCM.01409-17_zjm999095870s2.pdf]

Table S1. Molecular characterization and epidemiological data for the invasive WGS serogroup W isolates from Sweden (n=83).

| PubMLST ID | Finetype                 | Clonal complex (cc) | Serogroup | Lineage               | Year |
|------------|--------------------------|---------------------|-----------|-----------------------|------|
| 26067      | P1.18-1,3; F4-1; ST-22   | cc22                | W         |                       | 1995 |
| 38602      | P1.5,2; F1-1; ST-11      | cc11                | W         | Novel UK 2013 lineage | 2015 |
| 38614      | P1.5-2; F1-1; ST-11      | cc11                | W         | Novel UK 2013 lineage | 2015 |
| 38615      | P1.5-2; F1-1; ST-11      | cc11                | W         | Novel UK 2013 lineage | 2015 |
| 38690      | P1.5-2; F1-1; ST-11      | cc11                | W         | Novel UK 2013 lineage | 2015 |
| 38691      | P1.5-2; F1-1; ST-11      | cc11                | W         | Novel UK 2013 lineage | 2015 |
| 38692      | P1.5-2; F1-1; ST-11      | cc11                | W         | Novel UK 2013 lineage | 2015 |
| 38693      | P1.17-9; F1-7; ST-12019  | New                 | W         |                       | 2015 |
| 38694      | P1.5-2; F1-1; ST-11      | cc11                | W         | Novel UK 2013 lineage | 2015 |
| 39601      | P1.5-2; F1-7; ST-11      | cc11                | W         | Original UK lineage   | 2017 |
| 39602      | P1.5-2; F1-1; ST-11      | cc11                | W         | Novel UK 2013 lineage | 2017 |
| 39603      | P1.5-2; F1-1; ST-11      | cc11                | W         | Novel UK 2013 lineage | 2017 |
| 41963      | P1.5-2; F1-1; ST-11      | cc11                | W         | Novel UK 2013 lineage | 2016 |
| 41964      | P1.5-2; F1-1; ST-11      | cc11                | W         | Novel UK 2013 lineage | 2016 |
| 41966      | P1.5-2; F1-1; ST-11      | cc11                | W         | Original UK           | 2016 |
| 42320      | P1.18-1,3; F3-9; ST-22   | cc22                | W         |                       | 2013 |
| 42336      | P1.18-1,3; F3-9; ST-22   | cc22                | W         |                       | 2013 |
| 42363      | P1.5-2; F1-1; ST-11      | cc11                | W         | Novel UK 2013 lineage | 2014 |
| 42391      | P1.5-2; F1-1; ST-11      | cc11                | W         | Novel UK 2013 lineage | 2014 |
| 42420      | P1.5-2; F1-1; ST-11      | cc11                | W         | Novel UK 2013 lineage | 2016 |
| 42423      | P1.18-1,3; F4-1; ST-22   | cc22                | W         |                       | 2015 |
| 42424      | P1.5-2; F1-1; ST-11      | cc11                | W         | Novel UK 2013 lineage | 2016 |
| 42425      | P1.5-2; F1-1; ST-11      | cc11                | W         | Hajj                  | 2015 |
| 42436      | P1.5-2; F1-1; ST-11      | cc11                | W         | Novel UK 2013 lineage | 2016 |
| 42445      | P1.5-2; F1-1; ST-11      | cc11                | W         | Novel UK 2013 lineage | 2016 |
| 42786      | P1.5-2; F1-1; ST-11      | cc11                | W         | Novel UK 2013 lineage | 2016 |
| 45025      | P1.5-2; F1-1; ST-11      | cc11                | W         | Novel UK 2013 lineage | 2016 |
| 46377      | P1.5-2; F1-1; ST-11      | cc11                | W         | Novel UK 2013 lineage | 2016 |
| 46378      | P1.5-2; F1-1; ST-11      | cc11                | W         | Novel UK 2013 lineage | 2016 |
| 47166      | P1.5-2; F1-1; ST-11      | cc11                | W         | Novel UK 2013 lineage | 2016 |
| 47167      | P1.5-2; F1-1; ST-11      | cc11                | W         | Novel UK 2013 lineage | 2016 |
| 47170      | P1.18-1,3; F4-1; ST-22   | cc22                | W         |                       | 2016 |
| 47172      | P1.5-1,2-2; F3-9; ST-174 | cc174               | W         |                       | 1996 |
| 47173      | P1.5-1,2-2; F3-9; ST-174 | cc174               | W         |                       | 1996 |
| 47174      | P1.18-1,3; F3-9; ST-174  | cc174               | W         |                       | 1996 |
| 47175      | P1.5-2; F1-1; ST-11      | cc11                | W         | Other                 | 1998 |
| 47176      | P1.18-1,3; F4-1; ST-22   | cc22                | W         |                       | 1998 |
| 47177      | P1.5-2; F4-1; ST-11      | cc11                | W         | Other                 | 1998 |
| 47178      | P1.5-2; F1-14; ST-11     | cc11                | W         | Other                 | 1998 |
| 47179      | P1.5-2; F5-7; ST-60      | cc60                | W         |                       | 2000 |
| 47180      | P1.5-2; F1-1; ST-11      | cc11                | W         | Hajj sub-lineage      | 2000 |
| 47181      | P1.5-2; F1-1; ST-11      | cc11                | W         | Hajj sub-lineage      | 2000 |
| 47182      | P1.5-2; F1-1; ST-11      | cc11                | W         | Hajj sub-lineage      | 2000 |
| 47184      | P1.18-1,3; F4-1; ST-22   | cc22                | W         |                       | 2001 |

|       |                         |      |   |                            |      |
|-------|-------------------------|------|---|----------------------------|------|
| 47185 | P1.5-1,2-5; F5-8; ST-22 | cc22 | W |                            | 2001 |
| 47186 | P1.5-2; F1-1; ST-11     | cc11 | W | Hajj sub-lineage           | 2002 |
| 47187 | P1.5-2; F5-7; ST-60     | cc60 | W |                            | 2002 |
| 47188 | P1.5-2; F5-7; ST-60     | cc60 | W |                            | 2003 |
| 47189 | P1.5-2; F5-7; ST-60     | cc60 | W |                            | 2004 |
| 47190 | P1.18-1,3; F4-1; ST-22  | cc22 | W |                            | 2004 |
| 47191 | P1.18-1,3; F1-5; ST-22  | cc22 | W |                            | 2004 |
| 47192 | P1.5-2; F5-7; ST-60     | cc60 | W |                            | 2004 |
| 47193 | P1.18-1,3; F4-1; ST-22  | cc22 | W |                            | 2004 |
| 47194 | P1.5-2; F5-7; ST-60     | cc60 | W |                            | 2004 |
| 47195 | P1.5-2; F1-68; ST-11    | cc11 | W | South American sub-lineage | 2005 |
| 47196 | P1.5-2; F5-7; ST-60     | cc60 | W |                            | 2006 |
| 47197 | P1.18-1,3; F5-5; ST-22  | cc22 | W |                            | 2006 |
| 47198 | P1.18-1,3; F5-5; ST-22  | cc22 | W |                            | 2007 |
| 47199 | P1.5-2; F5-7; ST-60     | cc60 | W |                            | 2007 |
| 47200 | P1.5-2; F1-1; ST-11     | cc11 | W | South American sub-lineage | 2008 |
| 47201 | P1.18-1,3; F3-9; ST-22  | cc22 | W |                            | 2009 |
| 47202 | P1.21-26; F5-2; ST-60   | cc60 | W |                            | 2009 |
| 47204 | P1.5-2; F1-14; ST-11    | cc11 | W | Other                      | 2010 |
| 47205 | P1.18-1,3; F3-9; ST-22  | cc22 | W |                            | 2010 |
| 47206 | P1.5-2; F1-1; ST-11     | cc11 | W | Original UK lineage        | 2011 |
| 47207 | P1.18-1,3; F3-9; ST-22  | cc22 | W |                            | 2012 |
| 47208 | P1.5-2; F1-1; ST-11     | cc11 | W | Original UK lineage        | 2012 |
| 47209 | P1.5-2; F5-7; ST-60     | cc60 | W |                            | 2012 |
| 47210 | P1.18-1,3; F1-6; ST-22  | cc22 | W |                            | 2012 |
| 47211 | P1.5-2; F5-7; ST-60     | cc60 | W |                            | 2012 |
| 50863 | P1.5-2; F1-1; ST-11     | cc11 | W | Novel UK 2013 lineage      | 2016 |
| 50865 | P1.5-2; F1-1; ST-11     | cc11 | W | Novel UK 2013 lineage      | 2016 |
| 50872 | P1.5-2; F1-1; ST-11     | cc11 | W | Original UK lineage        | 2016 |
| 50875 | P1.5-2; F1-1; ST-11     | cc11 | W | Other                      | 2016 |
| 50975 | P1.5-2; F5-173; ST-11   | cc11 | W | Hajj sub-lineage           | 2016 |
| 51910 | P1.5-2; F1-1; ST-11     | cc11 | W | Novel UK 2013 lineage      | 2017 |
| 52796 | P1.5-2; F1-1; ST-11     | cc11 | W | Hajj sub-lineage           | 2017 |
| 52797 | P1.5-2; F1-1; ST-11     | cc11 | W | Hajj sub-lineage           | 2017 |
| 53033 | P1.5-2; F1-1; ST-11     | cc11 | W | Novel UK 2013 lineage      | 2013 |
| 53042 | P1.7-1,4-1; F4-1; ST-22 | cc22 | W |                            | 1999 |
| 53043 | P1.18-1,3; F4-1; ST-22  | cc22 | W |                            | 1999 |
| 53776 | P1.5-2; F1-1; ST-11     | cc11 | W | Hajj sub-lineage           | 2017 |
| 50876 | P1.5-2; F1-1; ST-11     | cc11 | W | Novel UK 2013 lineage      | 2016 |
